# Supplementary material for: High expressions of CD10, FAP and GPR77 in CAFs are associated with chemoresistance and worse prognosis in gastric cancer
Source: PubMed Central journal article supplement (PMC9650088; doi:10.3389/fonc.2022.984817), 2022-10-28
Supplement: Image_1.pdf [file Image_1.pdf]

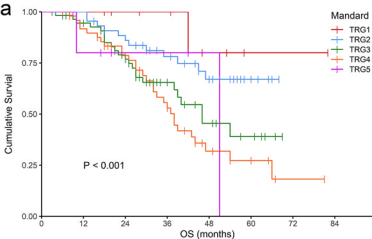

|      |    |    |    |    |    |   |   |   |
|------|----|----|----|----|----|---|---|---|
| TRG1 | 10 | 9  | 7  | 6  | 3  | 1 | 1 | 0 |
| TRG2 | 48 | 44 | 37 | 26 | 17 | 7 | 0 | 0 |
| TRG3 | 57 | 51 | 38 | 19 | 10 | 5 | 0 | 0 |
| TRG4 | 50 | 44 | 34 | 21 | 8  | 0 | 1 | 0 |
| TRG5 | 6  | 4  | 2  | 2  | 1  | 0 | 0 | 0 |

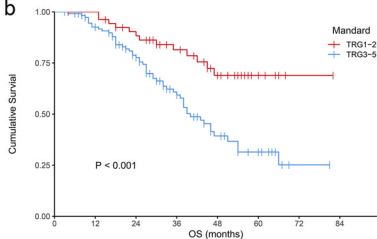

|        |     |    |    |    |    |    |   |   |
|--------|-----|----|----|----|----|----|---|---|
| TRG1-2 | 58  | 53 | 44 | 32 | 20 | 8  | 1 | 0 |
| TRG3-5 | 113 | 99 | 74 | 42 | 19 | 10 | 1 | 0 |

Supplementary Figure 1. Kaplan–Meier curves for overall survival (OS) of Mandard TRG (a-b): (a) 5-grade TRG. (b) pathological response (TRG 1-2 vs 3-5). Both TRG ( $p < 0.001$ ) and TRG (1-2 vs 3-5) ( $p < 0.001$ ) were significantly related to OS.
